# Supplementary material for: Economic evaluation of a weight control program with e-mail and telephone counseling among overweight employees: a randomized controlled trial
Source: PubMed Central journal article supplement (PMC3499374; doi:10.1186/1479-5868-9-112), 2012-09-11

# CE-plane phone vs control for body weight

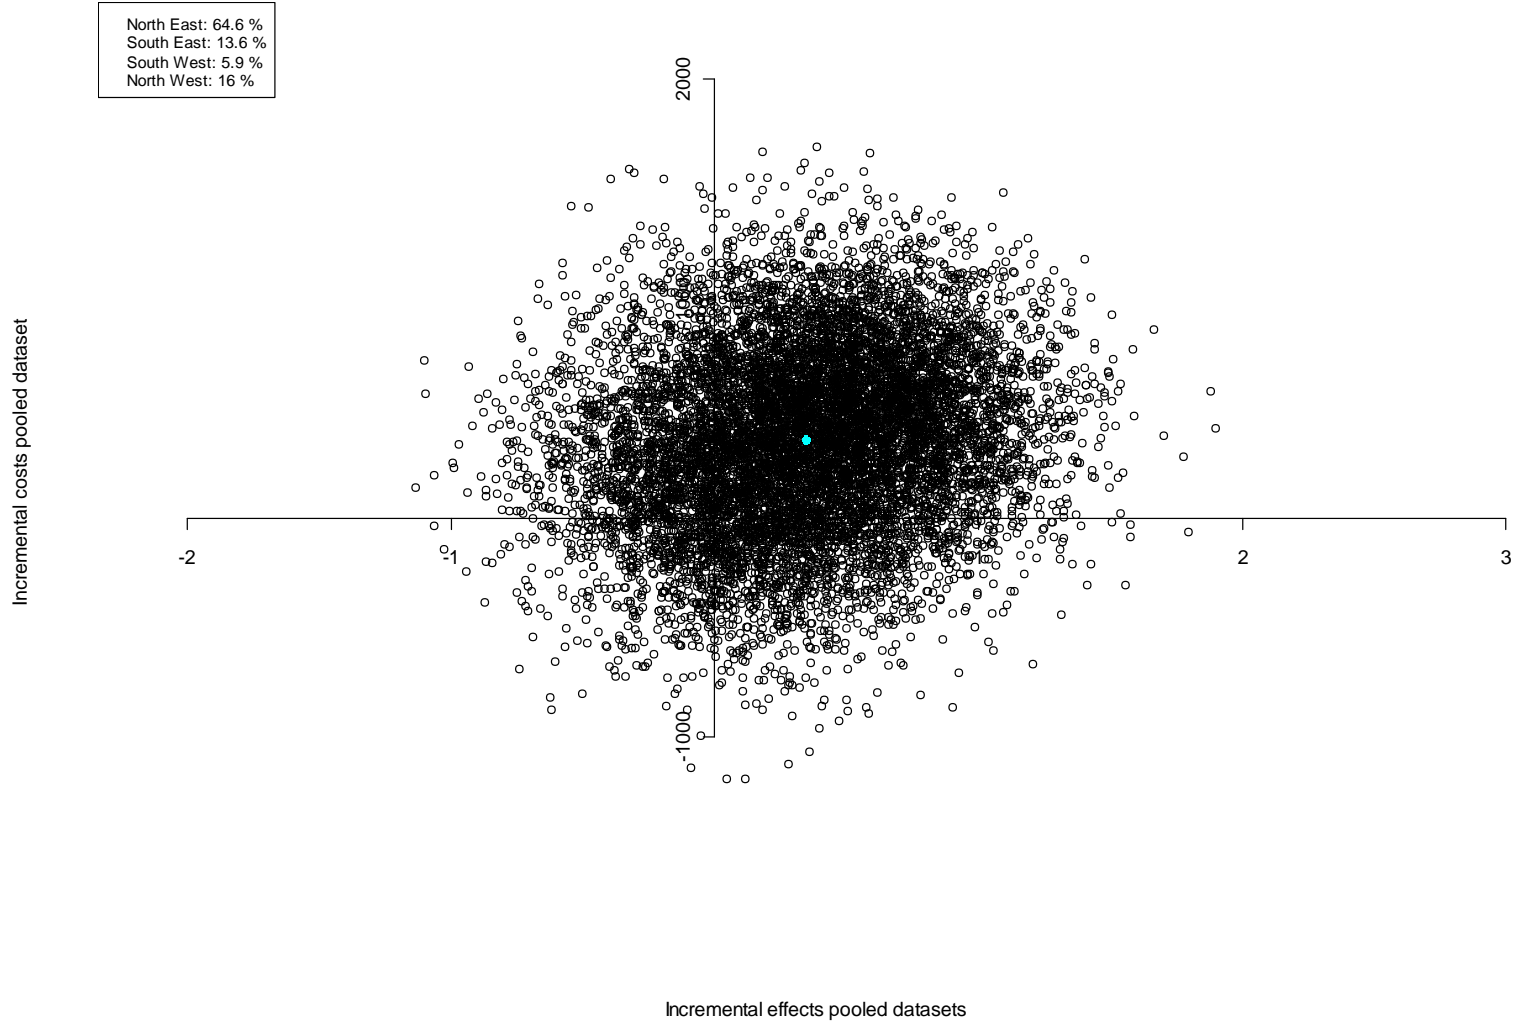

# CE-plane internet vs control for body weight

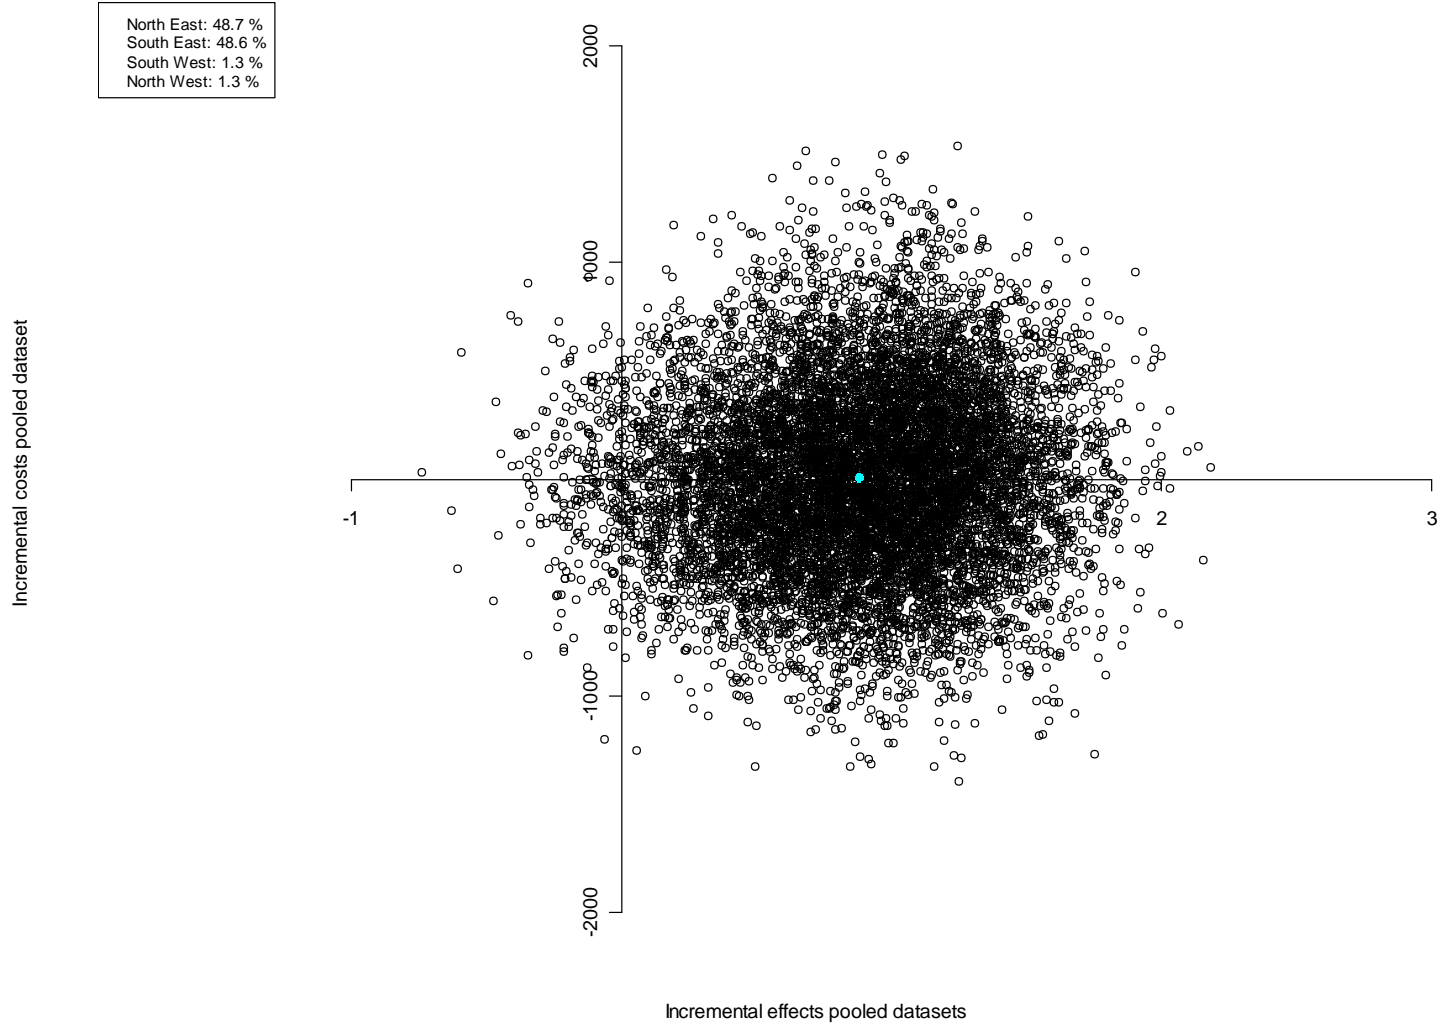

# Cost utility-plane phone vs control for QALYs gained

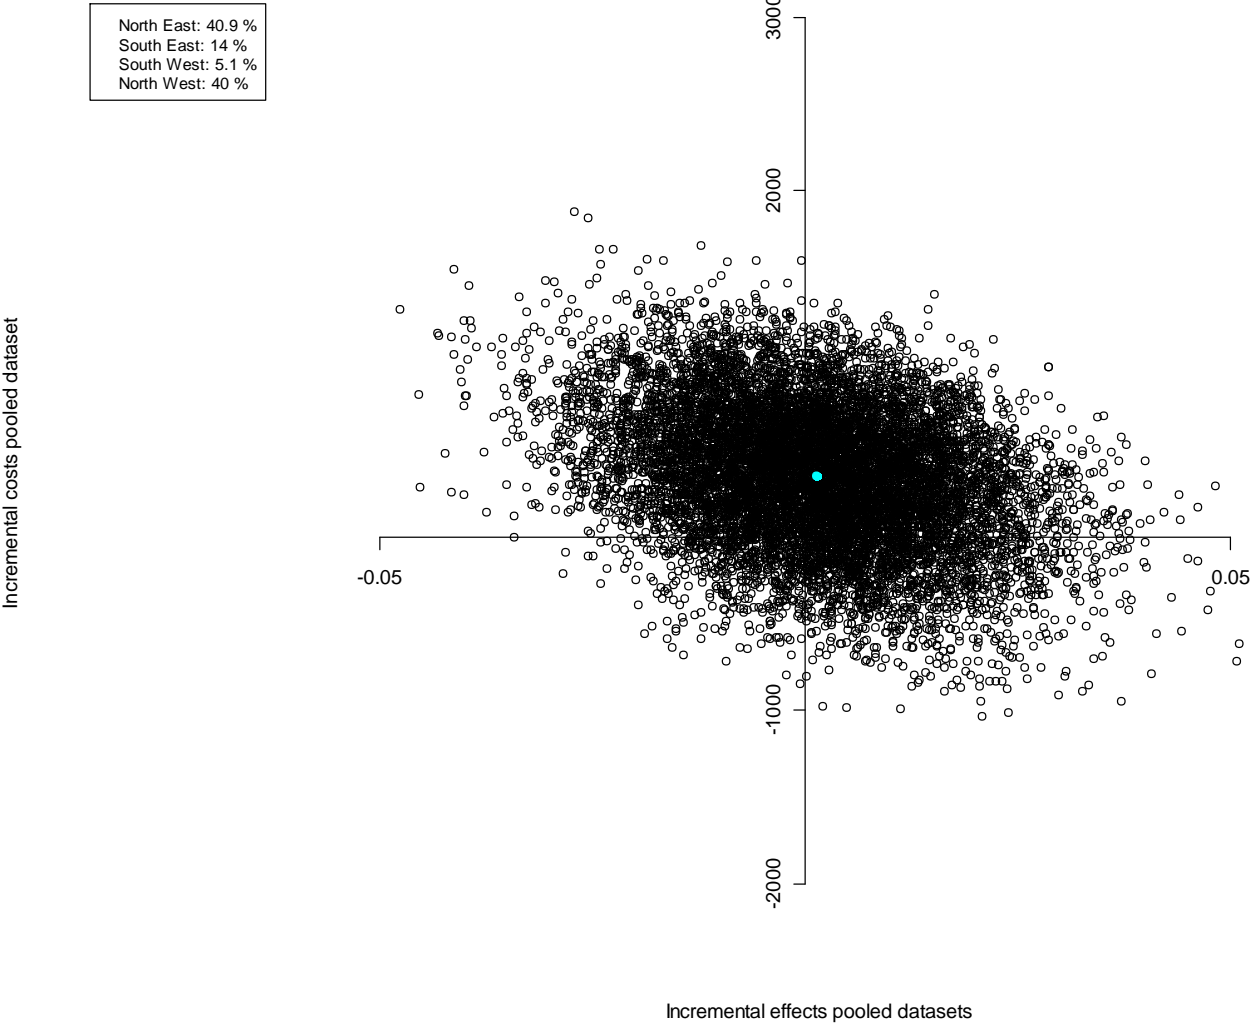

# Cost utility-plane internet vs control for QALYs gained

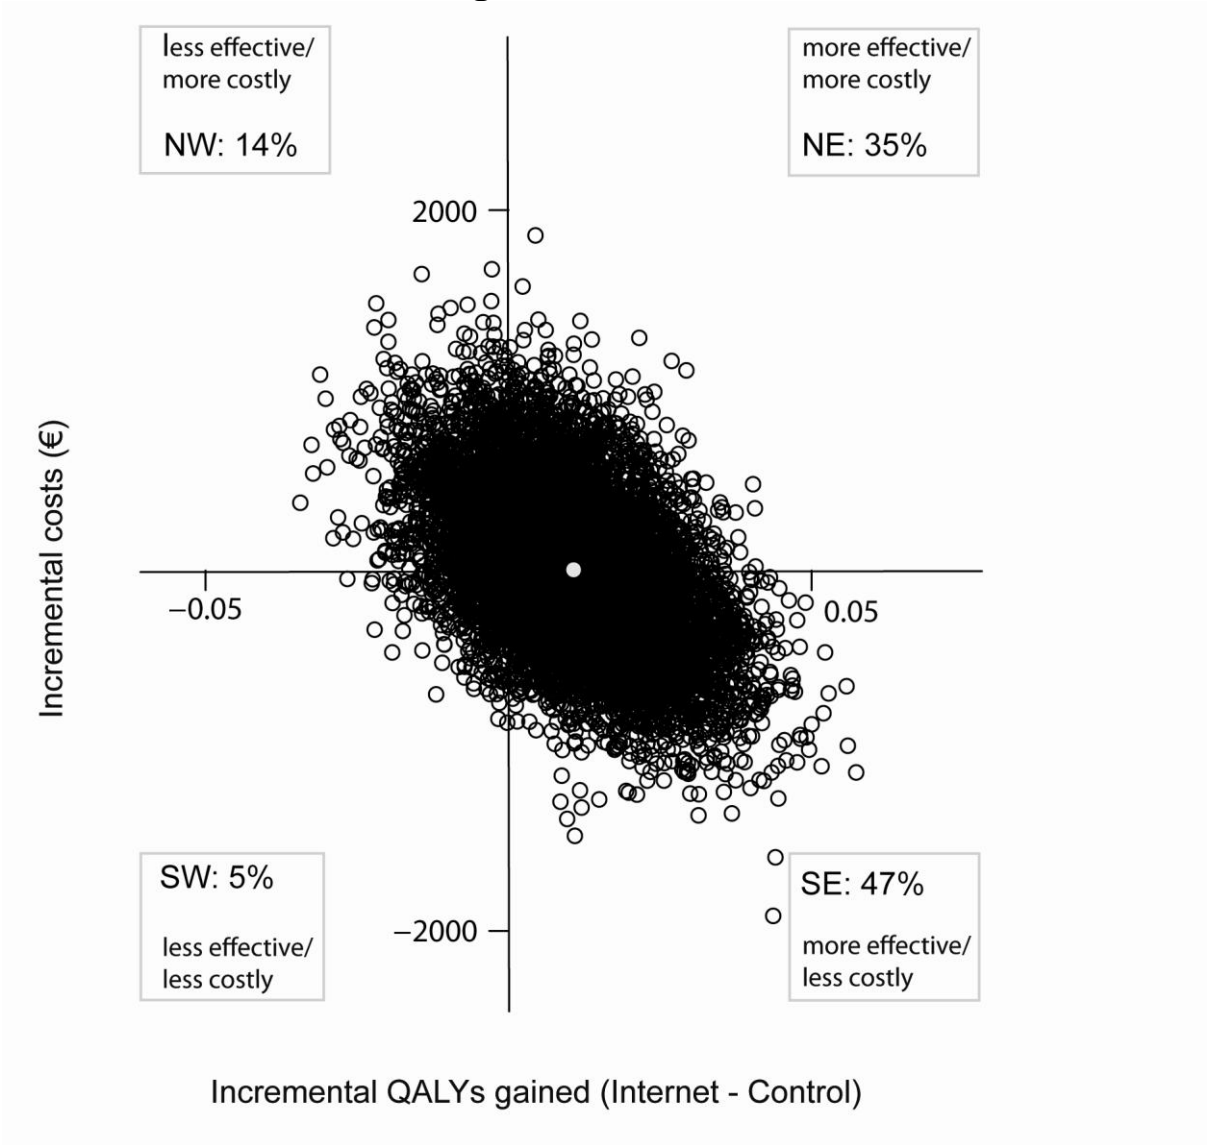

Supplement: 1479-5868-9-112-S2.pdf [file 1479-5868-9-112-S2.pdf]
